# Supplementary material for: Aptamer AS411 interacts with the KRAS promoter/hnRNP A1 complex and shows increased potency against drug-resistant lung cancer
Source: Royal Society of Chemistry journal article supplement (doi:10.1039/d3md00752a), 2024-01-01
Supplement: d3md00752a5.pdf [file d3md00752a5.pdf]

Electronic Supplementary Information

## **Aptamer AS411 interacts with the KRAS promoter/hnRNP A1 complex and shows increased potency against drug-resistant lung cancer**

#Yuejie Zhu<sup>1</sup>, # Xiang Li<sup>1</sup>, Qi Zhang<sup>1</sup>, Xiantao Yang<sup>1,2</sup>, Xudong Sun<sup>1</sup>, Yi Pan<sup>1</sup>, Xia Yuan<sup>1</sup>, Yuan Ma<sup>1</sup>, Bo Xu<sup>1</sup>, Zhenjun Yang<sup>1,\*</sup>

<sup>1</sup>State Key Laboratory of Natural and Biomimetic Drugs, School of Pharmaceutical Sciences, Peking University, Beijing, 100191, China

<sup>2</sup>School of Pharmacy, Chengdu Medical College, 783 Xindu Avenue, Xindu District, Chengdu, 610500, China

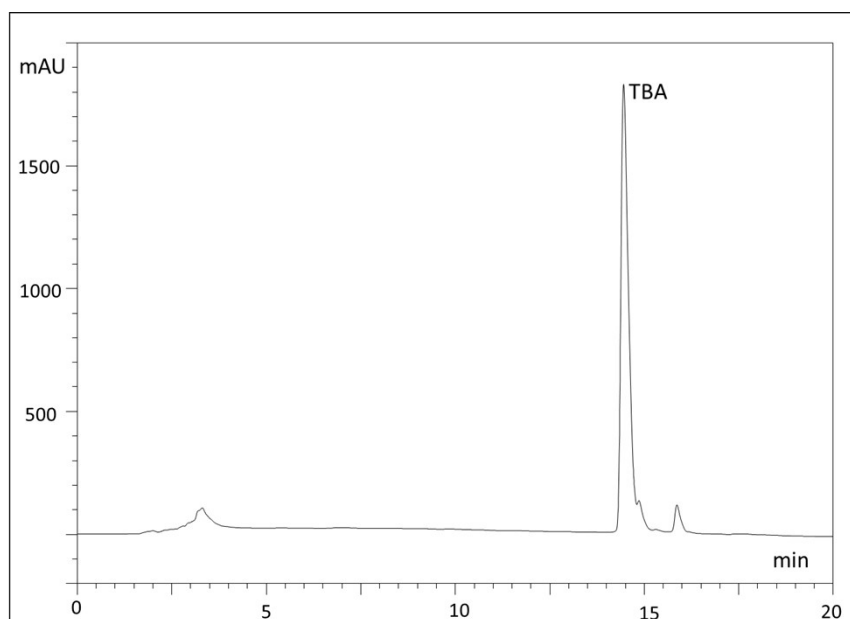

**Figure S1.** HPLC purification of nucleotide sequences, TBA as example. (Linear gradient using 5–35% acetonitrile–TEAB 100 mM in 20 min, XBridge™ OST C18 2.5 $\mu$ m 10 $\times$ 50 mm Column, 60°C, 1.5 mL/min, 260 nm).

---

\*To whom correspondence should be addressed. E-mail: yangzj@bjmu.edu.cn, Tel & Fax: 86-10-82802503.

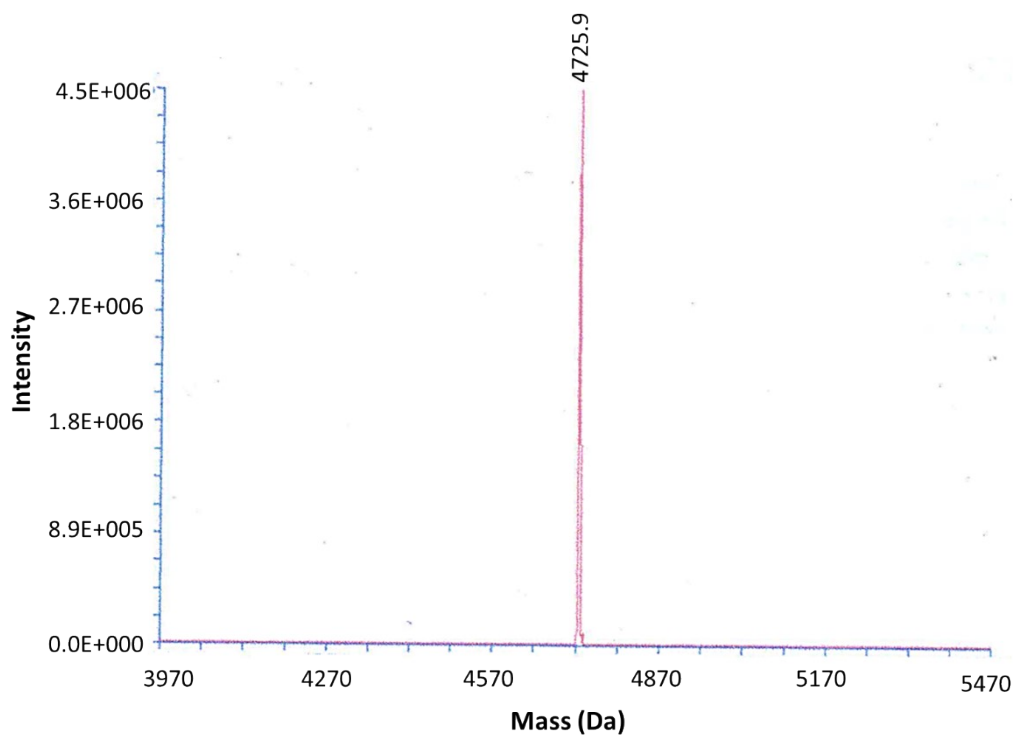

**Figure S2.** ESI-TOF spectrum of TBA

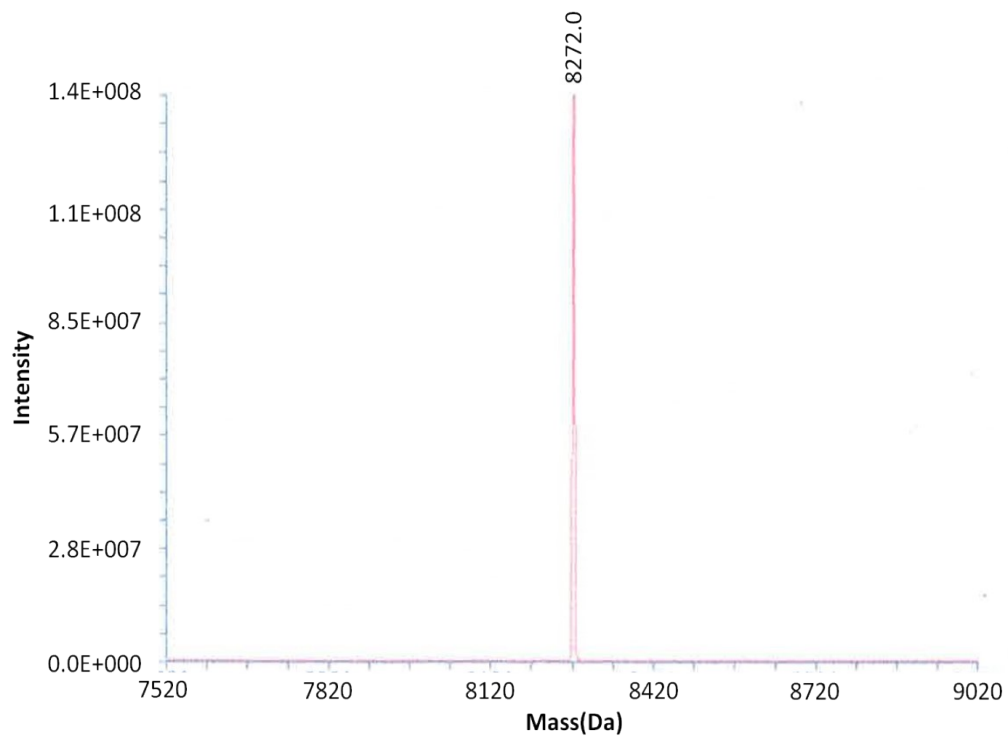

**Figure S3.** ESI-TOF spectrum of AS1411.

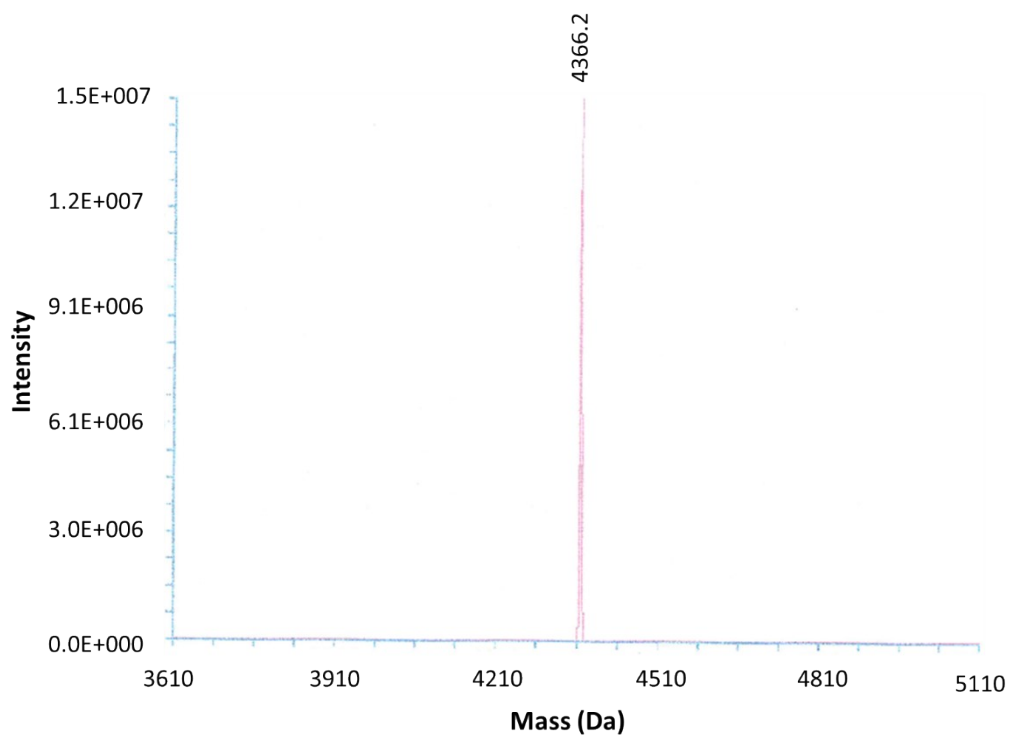

**Figure S4.** ESI-TOF spectrum of NC

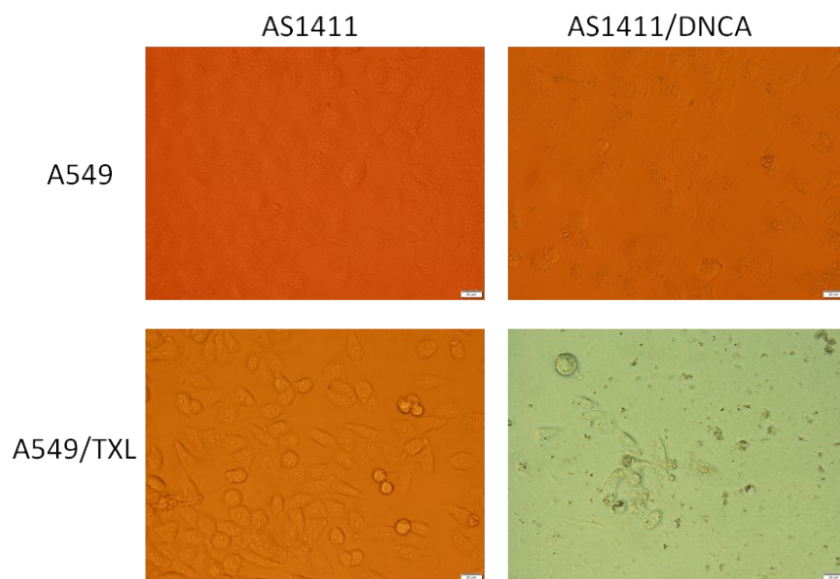

**Figure S5.** Inverted microscopy of A549 and A549/TXL cells 48 h after treated with AS1411 or AS1411/DNCA (AS1411: 200 nM, DNCA: 26  $\mu$ M). The microscopy was performed 2 h after addition of CCK-8 agent.

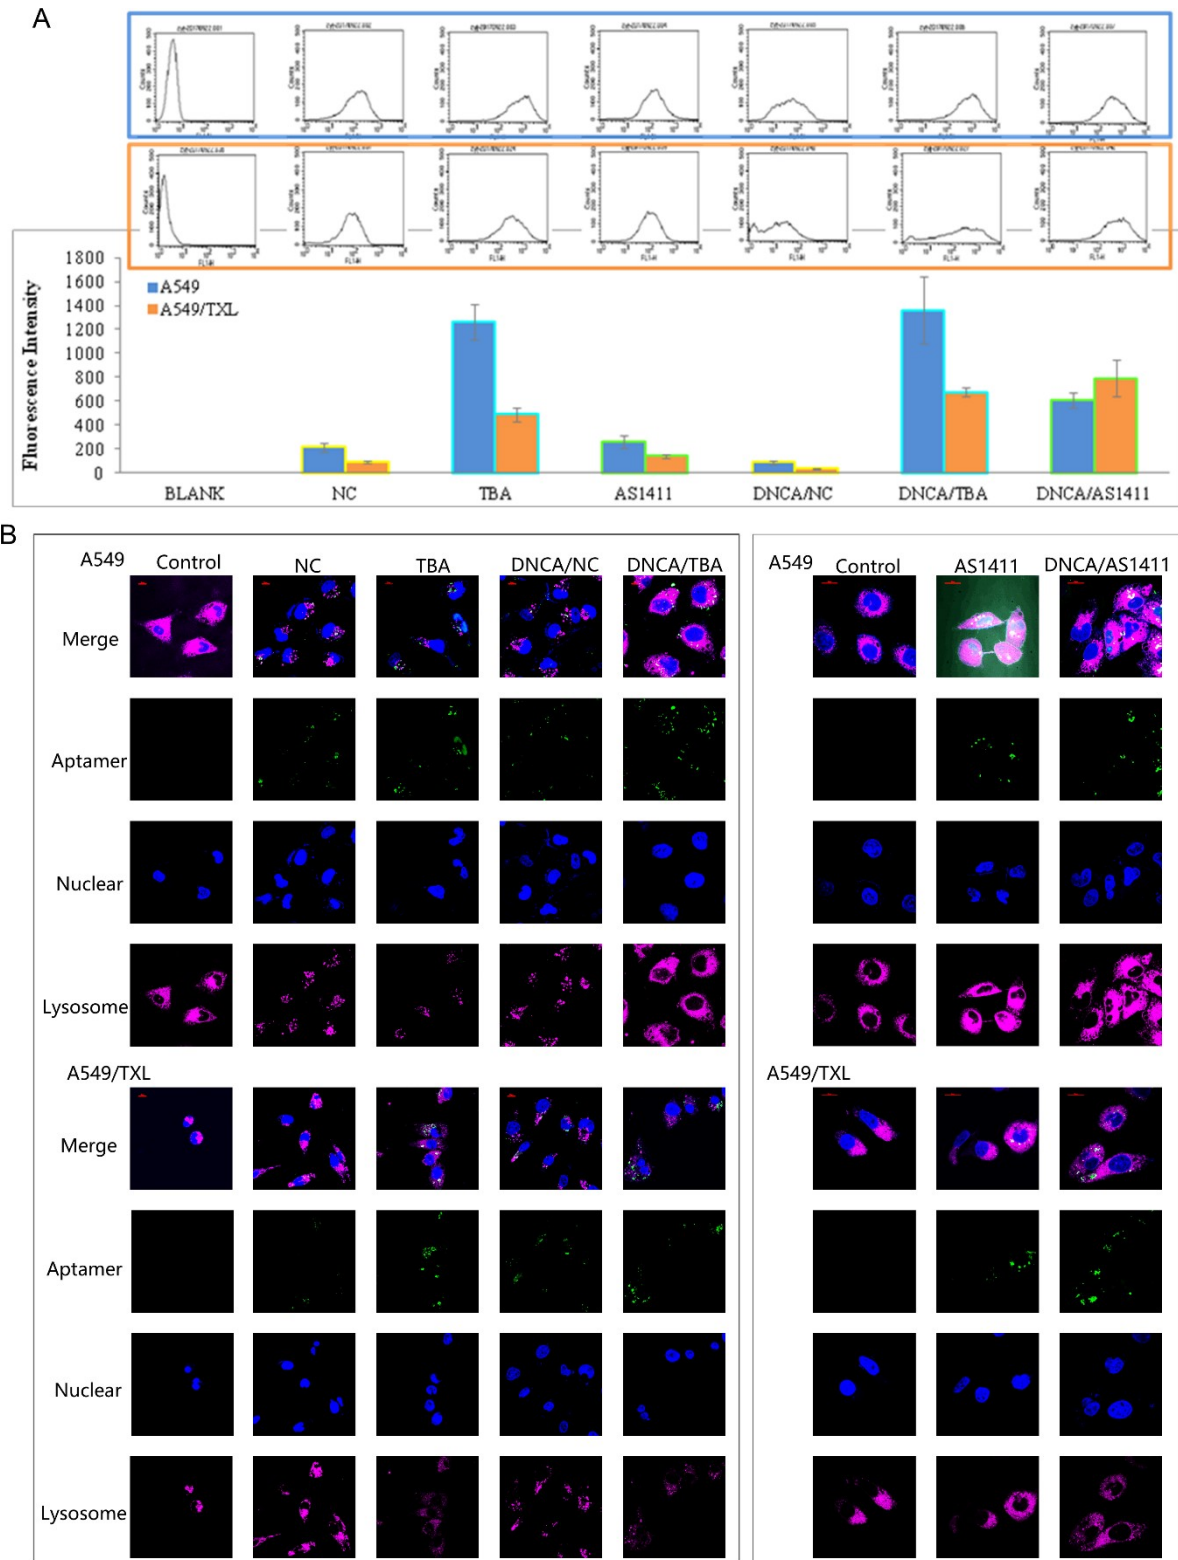

**Figure S6.** Cellular uptake of TBA and AS1411 by A549 and A549/TXL cells (aptamer or NC: 100 nM, DNCA: 7.5  $\mu$ M). Cellular uptake was analyzed 4 h after addition of FAM-labelled aptamer (encapsulated by DNCA) by flow cytometry (**A**) and confocal microscopy (**B**). A pool of three different sets of experiments (each repeated in triplicate) was performed, and each value expressed as mean  $\pm$  Standard Deviation.

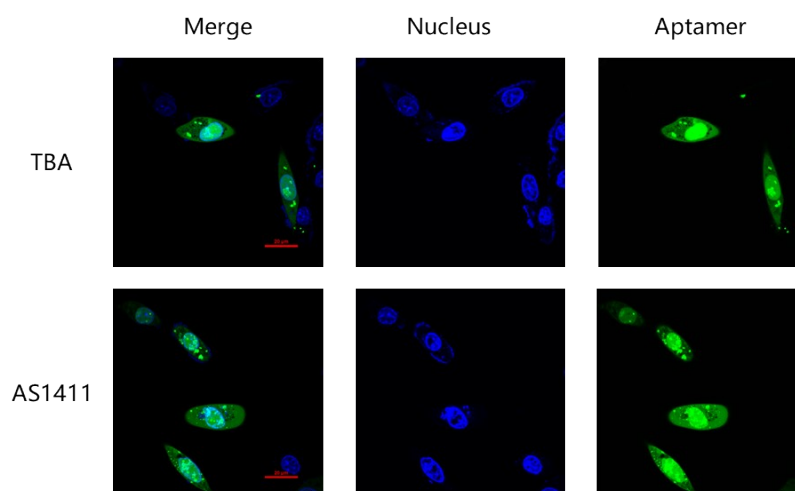

**Figure S7.** Distribution of TBA and AS1411 in the nucleus of A549/TXL cell. Cellular distribution was analyzed 8 h after addition of FAM-labelled aptamer by confocal microscopy (aptamer or NC: 100 nM, DNCA: 7.5  $\mu$ M).

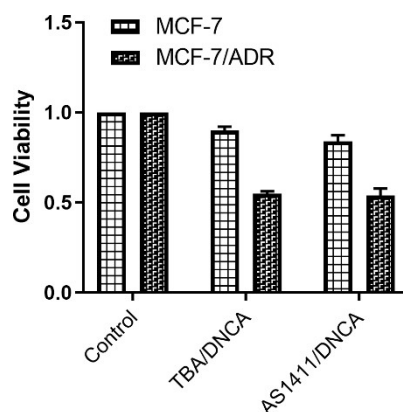

**Figure S8.** Effect of TBA and AS1411 on the growth of MCF-7, MCF-7/ADR cells. Cell viability was assayed 48 h after addition of aptamer (aptamer: 200 nM, DNCA: 15  $\mu$ M) using the CCK-8 assay.

**Table S1.** Ribosome associated proteins with significant change in TBA/DNCA vs Control

| protein | ratio | P-value | protein | ratio | P-value | protein | ratio | P-value |
|---------|-------|---------|---------|-------|---------|---------|-------|---------|
| RPL9    | 1.232 | 0.036   | RPS15A  | 1.554 | 0.013   | RPL11   | 1.268 | 0.024   |
| MRPS23  | 0.770 | 0.002   | RPS23   | 0.752 | 0.012   | MRPS5   | 0.711 | 0.006   |
| RPL21   | 0.795 | 0.041   | RPS18   | 1.238 | 0.022   | RPL6    | 1.514 | 0.003   |
| RPLP1   | 0.492 | 0.011   | RPL7A   | 1.295 | 0.042   | MRPS31  | 1.416 | 0.009   |
| RPS9    | 1.224 | 0.008   | RPS26   | 1.206 | 0.011   | MRPL20  | 1.345 | 0.023   |
| RPL14   | 1.940 | 0.005   | RPS28   | 2.015 | 0.039   | MRPL18  | 1.692 | 0.041   |
| RPL15   | 1.673 | 0.010   | RPL24   | 1.763 | 0.021   |         |       |         |
| RPS8    | 1.349 | 0.000   | RPL18A  | 1.398 | 0.002   |         |       |         |

**Table S2.** Ribosome associated proteins with significant change in AS1411/DNCA vs Control

| protein | ratio | P-value | protein | ratio | P-value | protein | ratio | P-value |
|---------|-------|---------|---------|-------|---------|---------|-------|---------|
| RPL9    | 1.347 | 0.013   | RPL26   | 1.211 | 0.044   | RPL7A   | 1.339 | 0.044   |
| MRPL22  | 0.730 | 0.049   | RPL15   | 1.666 | 0.018   | RPS6    | 1.237 | 0.028   |
| RPL18   | 0.727 | 0.010   | RPL37A  | 0.795 | 0.002   | RPL11   | 1.374 | 0.008   |
| RPLP1   | 0.471 | 0.006   | RPL37   | 0.798 | 0.038   | MRPS5   | 0.674 | 0.006   |
| RPL7    | 1.207 | 0.029   | RPS8    | 1.255 | 0.019   | RPL6    | 1.520 | 0.028   |
| RPS9    | 1.294 | 0.004   | RPS15A  | 1.674 | 0.015   | MRPL13  | 0.752 | 0.033   |
| RPL34   | 1.282 | 0.028   | RPS23   | 0.817 | 0.042   | MRPL18  | 1.660 | 0.001   |
| RPL14   | 1.949 | 0.030   | RPS18   | 1.216 | 0.043   | MRPL39  | 1.213 | 0.038   |

**Table S3.** Ubiquitination related proteins with significant change in TBA/DNCA vs Control

| protein | ratio | P-value | protein | ratio | P-value | protein  | ratio | P-value |
|---------|-------|---------|---------|-------|---------|----------|-------|---------|
| UCHL5   | 1.201 | 0.027   | MTOR    | 0.825 | 0.035   | ZSWIM2   | 0.699 | 0.027   |
| OTUB1   | 1.378 | 0.047   | RAD23B  | 0.793 | 0.026   | DTX3L    | 0.177 | 0.015   |
| EIF3F   | 1.223 | 0.001   | FKBP1A  | 0.703 | 0.001   | CDK5RAP3 | 1.204 | 0.003   |
| SNX3    | 1.268 | 0.041   | MAD2L1  | 0.755 | 0.009   | PSMB7    | 0.76  | 0.013   |
| LATS1   | 0.772 | 0.034   | UBE2V1  | 0.572 | 0.014   | RNF126   | 0.601 | 0.041   |
| PSMA5   | 0.667 | 0.002   | TRIM25  | 0.746 | 0.022   | TRIM4    | 0.125 | 0.042   |
| PSMB6   | 1.306 | 0.031   | RBBP6   | 1.29  | 0.043   | PDCL3    | 0.733 | 0.036   |
| CDC27   | 0.778 | 0.015   | SYVN1   | 1.533 | 0.002   | PEF1     | 0.806 | 0.03    |

**Table S4.** Ubiquitination related proteins with significant change in AS1411/DNCA vs control

| protein | ratio | P-value | protein | ratio | P-value | protein  | ratio | P-value |
|---------|-------|---------|---------|-------|---------|----------|-------|---------|
| USP39   | 1.476 | 0.009   | RAD23A  | 0.774 | 0.021   | UBR7     | 1.481 | 0.040   |
| OTUB1   | 1.373 | 0.011   | FKBP1A  | 0.698 | 0.001   | ZSWIM2   | 0.656 | 0.009   |
| EIF3F   | 1.263 | 0.018   | FOXK1   | 1.239 | 0.017   | DTX3L    | 0.165 | 0.009   |
| FBXO21  | 0.746 | 0.006   | CDK5    | 0.753 | 0.047   | CDK5RAP3 | 1.281 | 0.013   |
| FBXO45  | 1.567 | 0.032   | MAD2L1  | 0.765 | 0.039   | PSMB7    | 0.791 | 0.011   |
| PSMA1   | 1.212 | 0.005   | UBE2V1  | 0.588 | 0.009   | RNF126   | 0.641 | 0.022   |
| PSMA5   | 0.643 | 0.002   | TRIM25  | 0.769 | 0.009   | RBCK1    | 0.757 | 0.039   |
| MTOR    | 0.818 | 0.018   | UBE2R2  | 0.796 | 0.048   | TRIM4    | 0.168 | 0.044   |
| PSMB3   | 1.220 | 0.012   | RBBP6   | 1.326 | 0.040   | PDCL3    | 0.671 | 0.039   |

**Table S5.** Sequences of primer used

| Primer        | Sequence(5'-3')                |
|---------------|--------------------------------|
| GAPDH-forward | CAT CAC TGC CAC CCA GAA GAC TG |
| GAPDH-reverse | ATG CCA GTG AGC TTC CCG TTC AG |
| KRAS- forward | CAG TAG ACA CAA AAC AGG CTC AG |
| KRAS- reverse | TGT CGG ATC TCC CTC ACC AAT G  |
