# Supplementary figures and images for: Aptamer AS411 interacts with the KRAS promoter/hnRNP A1 complex and shows increased potency against drug-resistant lung cancer
Source: Royal Society of Chemistry journal article supplement (doi:10.1039/d3md00752a), 2024-01-01

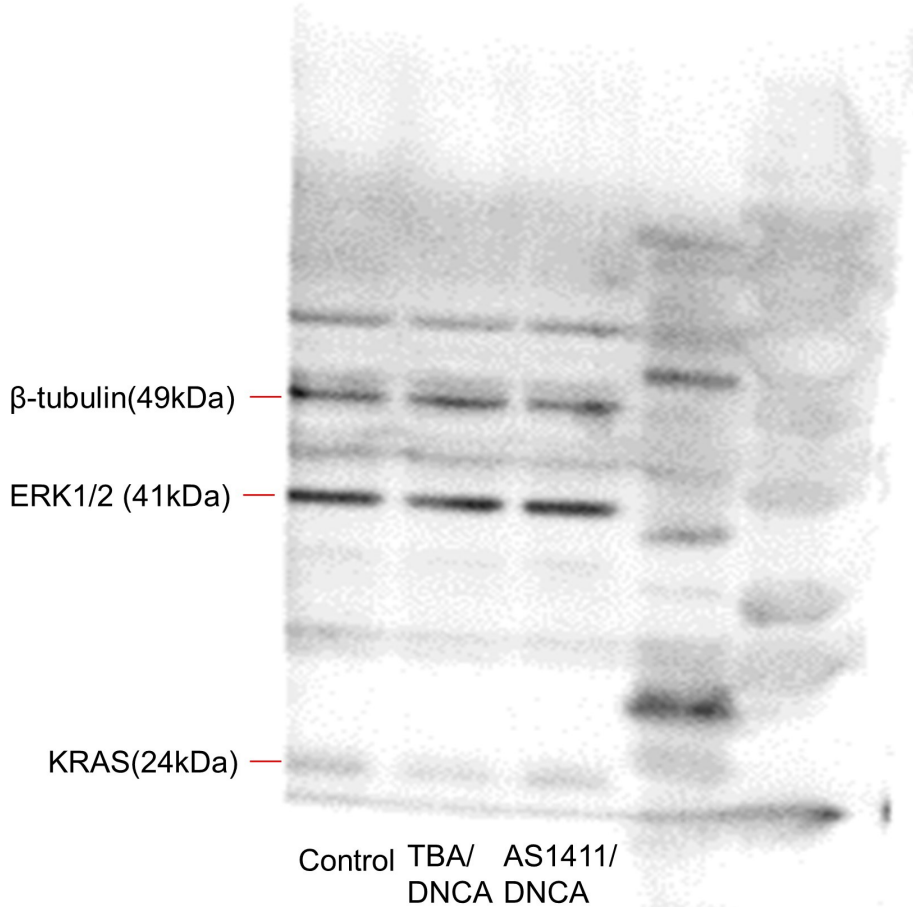

Supplement: d3md00752a1.pdf [file d3md00752a1.pdf]

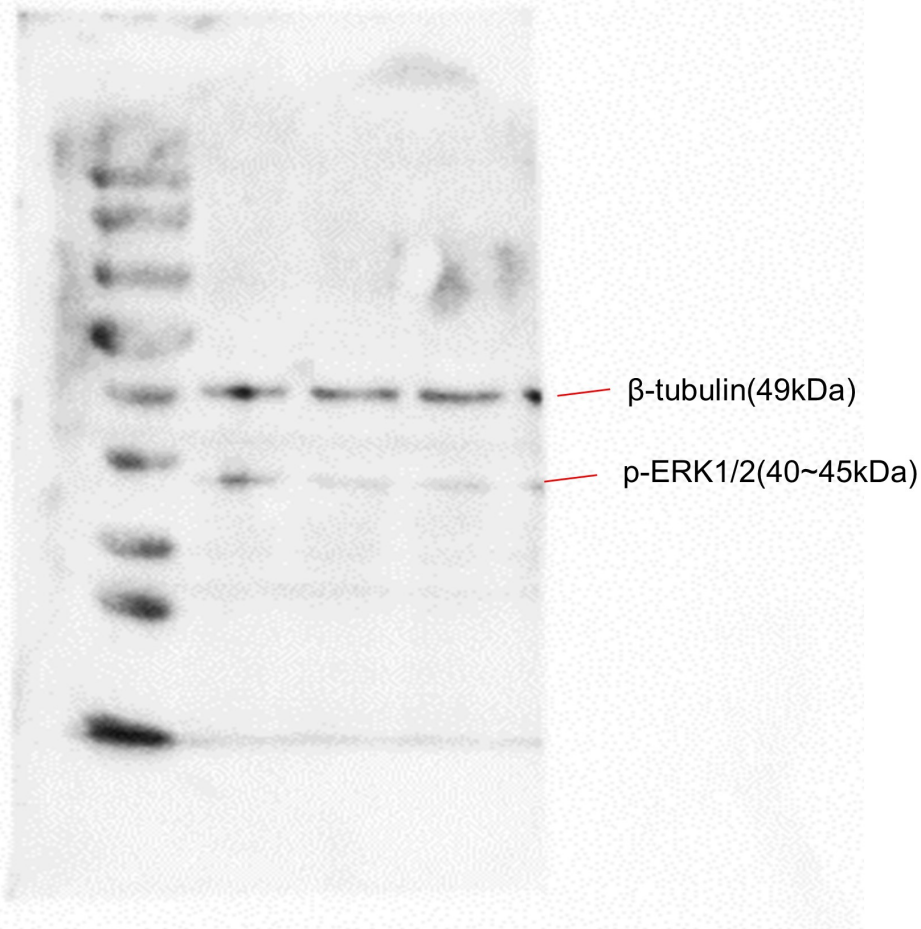

Control TBA/ AS1411/  
DNCA DNCA

Supplement: d3md00752a2.pdf [file d3md00752a2.pdf]

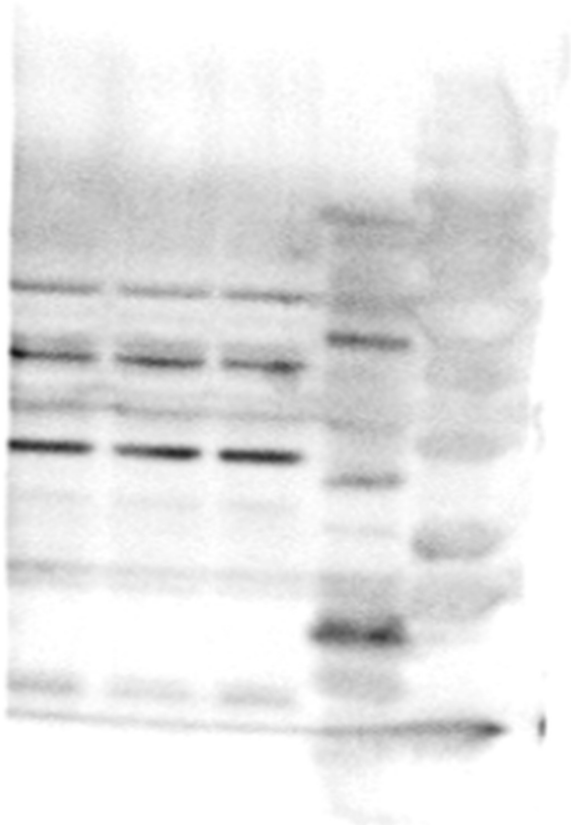

Supplement: d3md00752a3.pdf [file d3md00752a3.pdf]

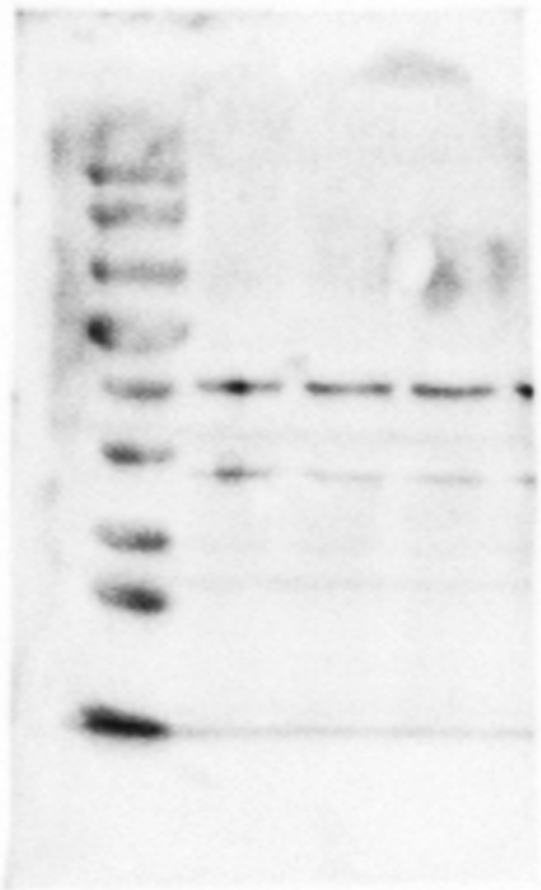

Supplement: d3md00752a4.pdf [file d3md00752a4.pdf]
